# Supplementary material for: Facile synthesis of g-C3N4 nanosheets loaded with WO3 nanoparticles with enhanced photocatalytic performance under visible light irradiation
Source: Royal Society of Chemistry journal article supplement (doi:10.1039/c7ra02297b), 2017-01-01
Supplement: c7ra02297b1.pdf [file c7ra02297b1.pdf]

## ***Electronic Supplementary Information***

Facile synthesis of g-C<sub>3</sub>N<sub>4</sub> nanosheets loaded with WO<sub>3</sub> nanoparticles with enhanced photocatalytic performance under visible light irradiation

Jie Meng<sup>a</sup>, Jingyuan Pei<sup>a</sup>, Zefang He<sup>a</sup>, Shiyan Wu<sup>a</sup>, Qingyun Lin<sup>a</sup>, Xiao Wei<sup>a,\*</sup>, Jixue Li<sup>a</sup>, Ze Zhang<sup>a</sup>

<sup>a</sup> *Center of Electron Microscopy, State Key Laboratory of Silicon Materials, and School of Materials Science and Engineering, Zhejiang University, Hangzhou, 310027, PR China*

\*Corresponding author. Tel. +86 571 87952797; fax: +86 571 87952797;

E-mail address: mseweixiao@zju.edu.cn (X. Wei).

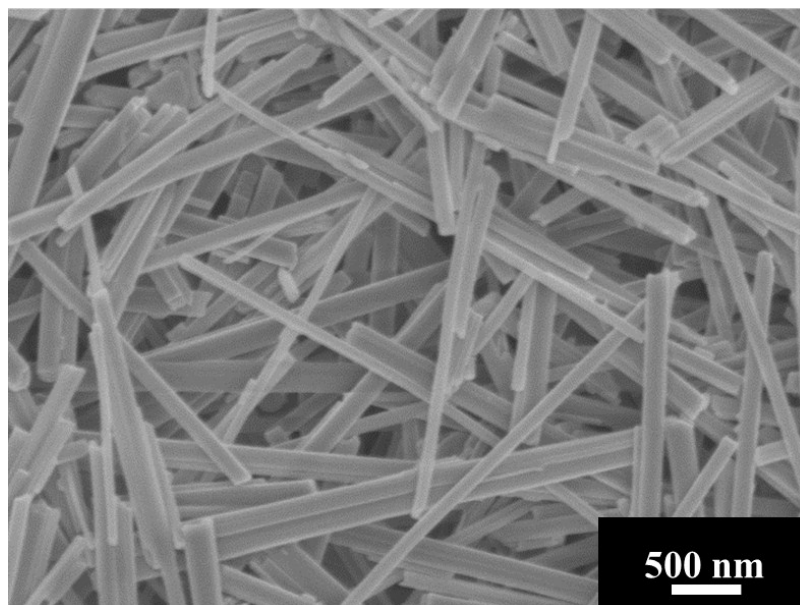

**Fig. S1** SEM image of WO<sub>x</sub>-EDA.

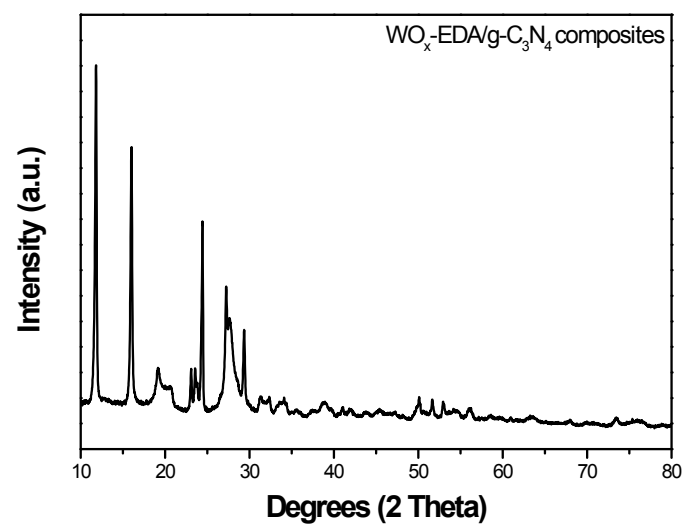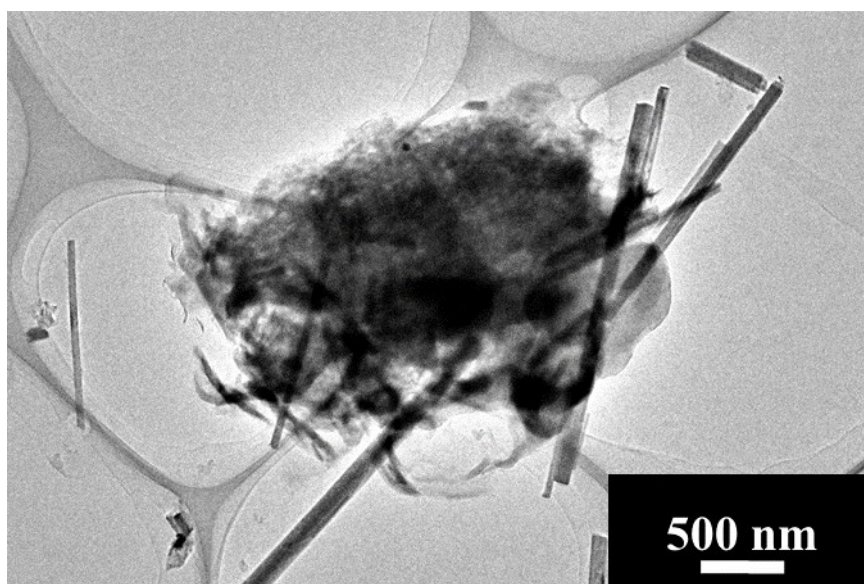

**Fig. S2** XRD pattern and TEM image of  $\text{WO}_x\text{-EDA/g-C}_3\text{N}_4$  composites.

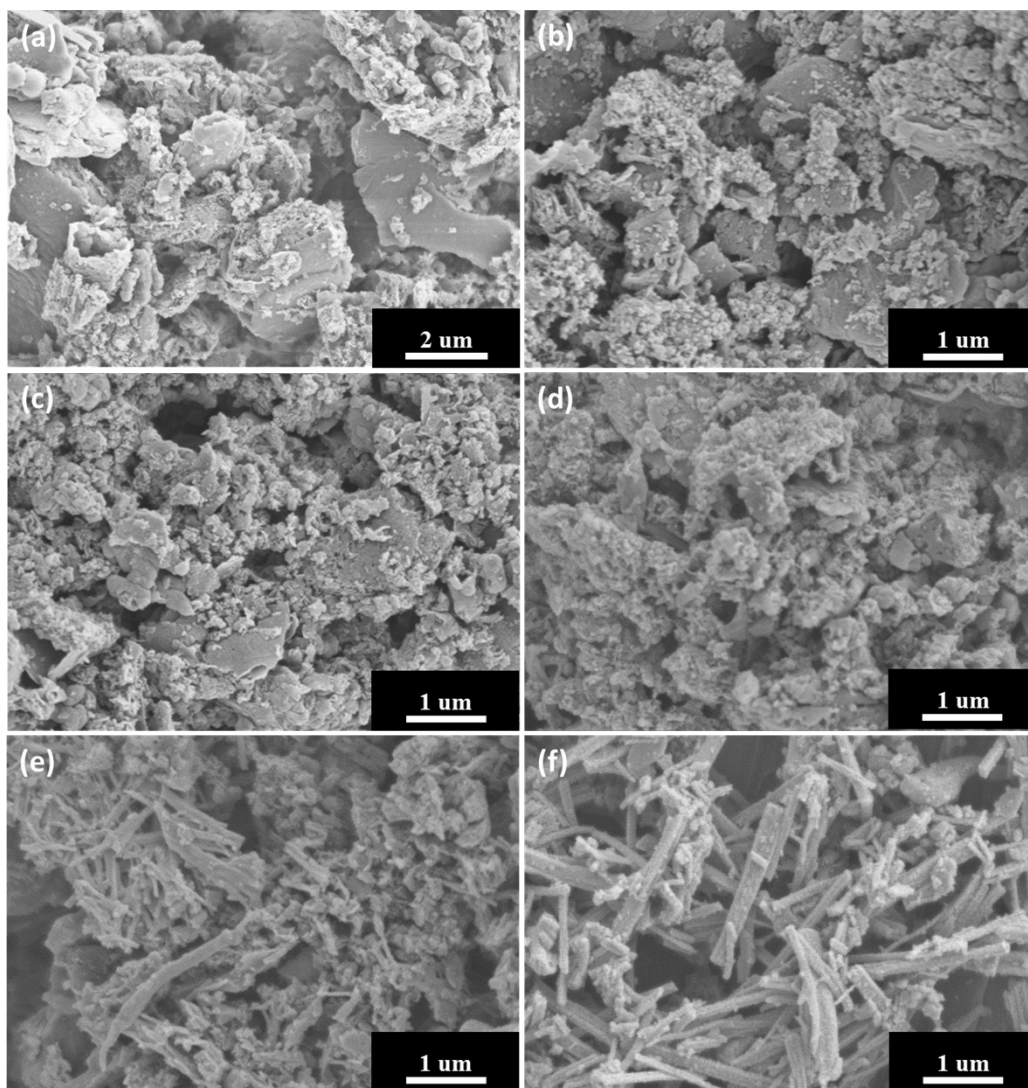

**Fig. S3** SEM images of (a) CN; (b) WECN20; (c) WECN40; (d) WECN60; (e) WECN80; (f)  $\text{WO}_3$ ;

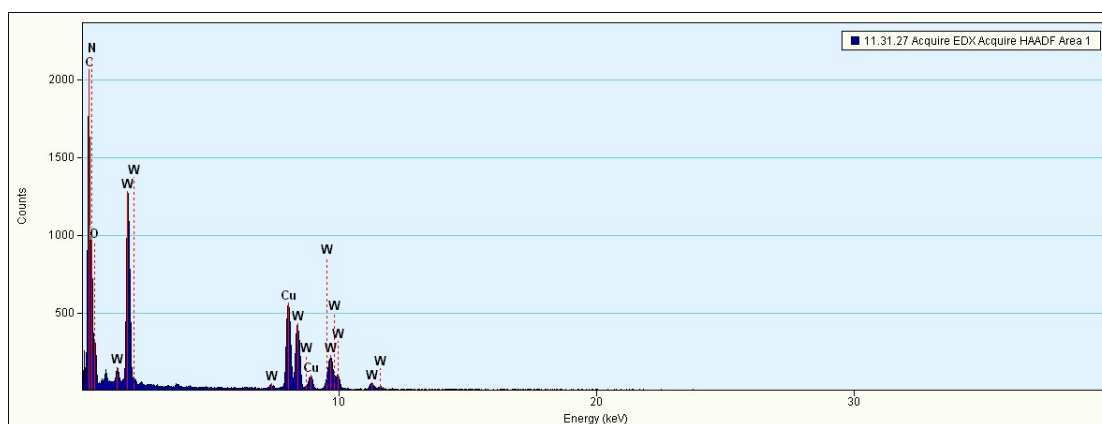

**Fig. S4** EDS spectrum of WECN40.

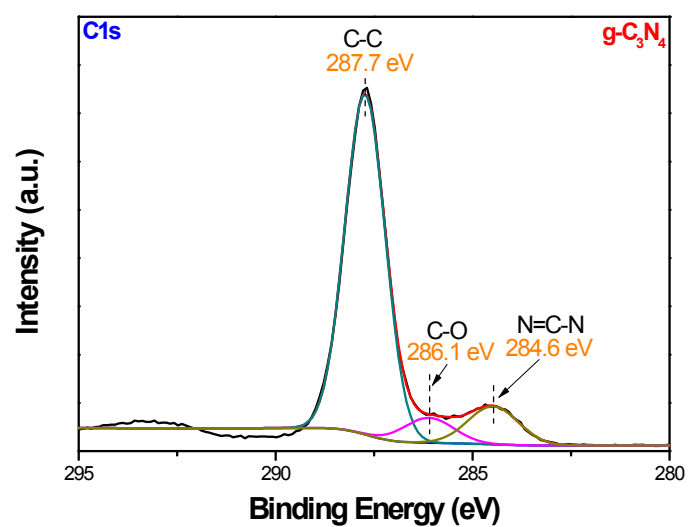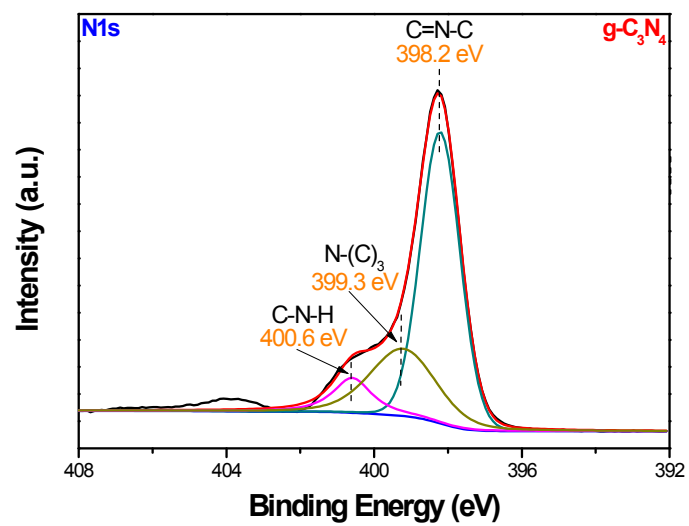

Fig. S5 High resolution XPS spectra of C1s and N1s for CN.

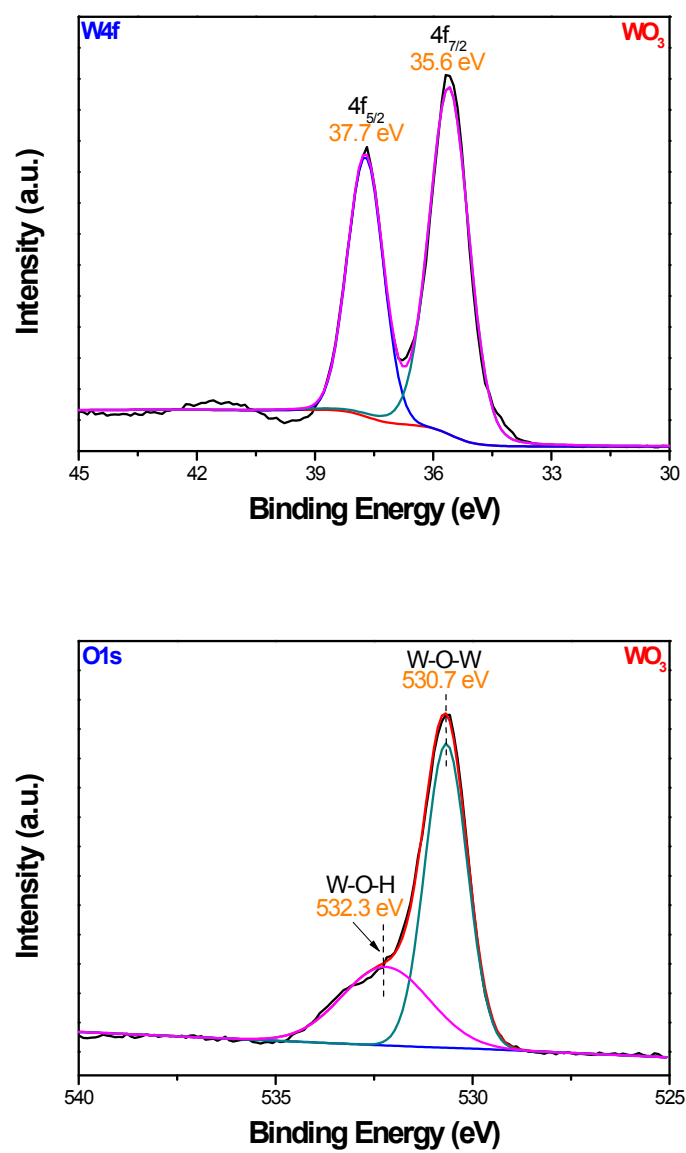

Fig. S6 High resolution XPS spectra of W4f and O1s for  $\text{WO}_3$

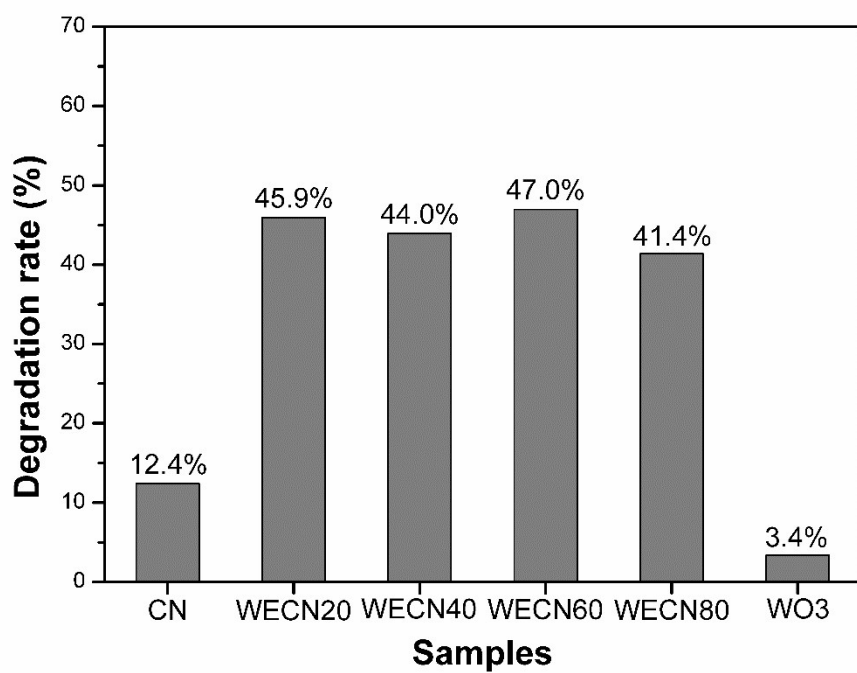

Fig. S7 Photocatalytic degradation of phenol under visible light irradiation ( $\lambda \geq 420$  nm). Catalysts: 0.1g; phenol: 10 mg/L, 100 mL; Reaction time: 3h.

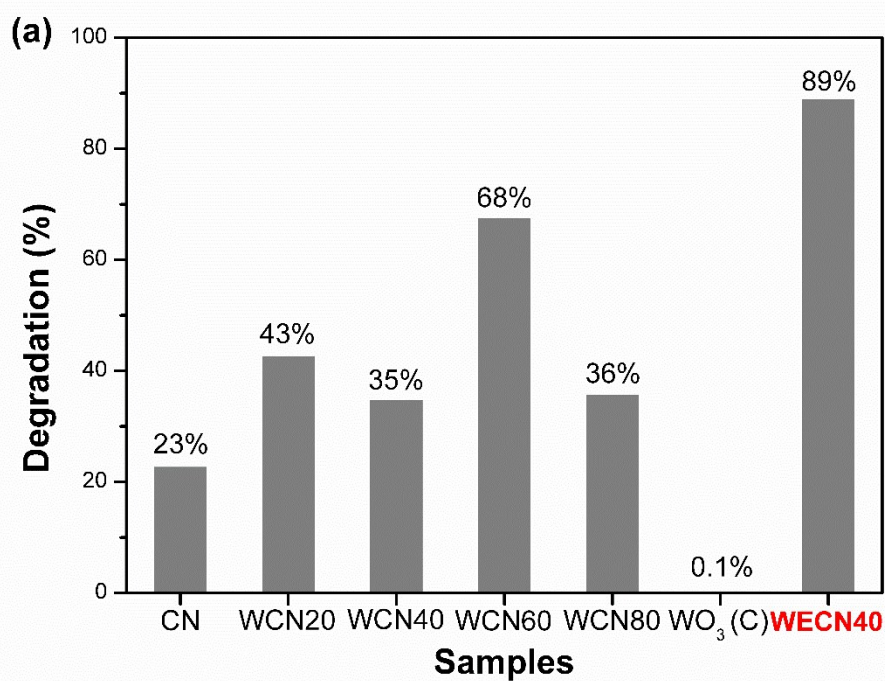



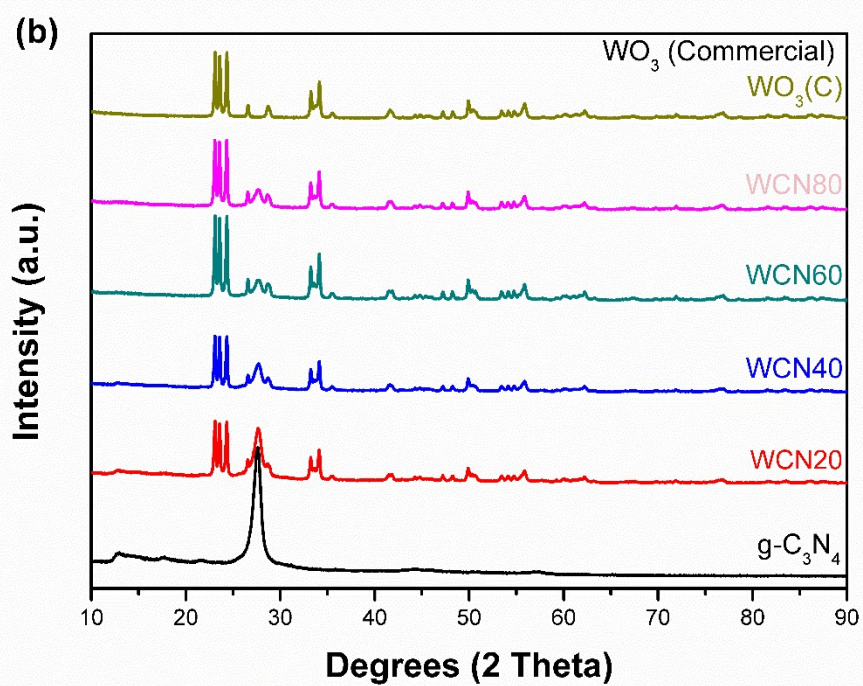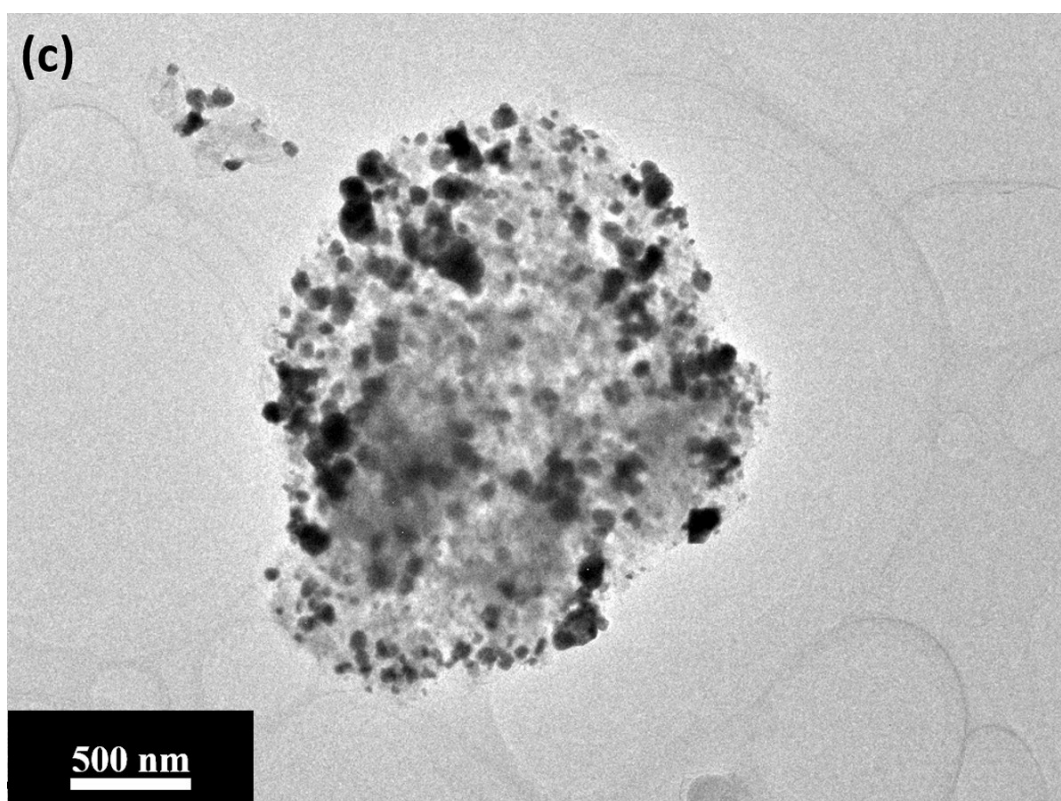

**Fig. S8** (a) Photodegradation of RhB, (b) XRD patterns of samples; and TEM image of WCN60 using commercial WO<sub>3</sub> instead of WO<sub>x</sub>-EDA as precursor to fabricate g-C<sub>3</sub>N<sub>4</sub> nanosheets loading with WO<sub>3</sub> particles and WCN40 is used as comparison.

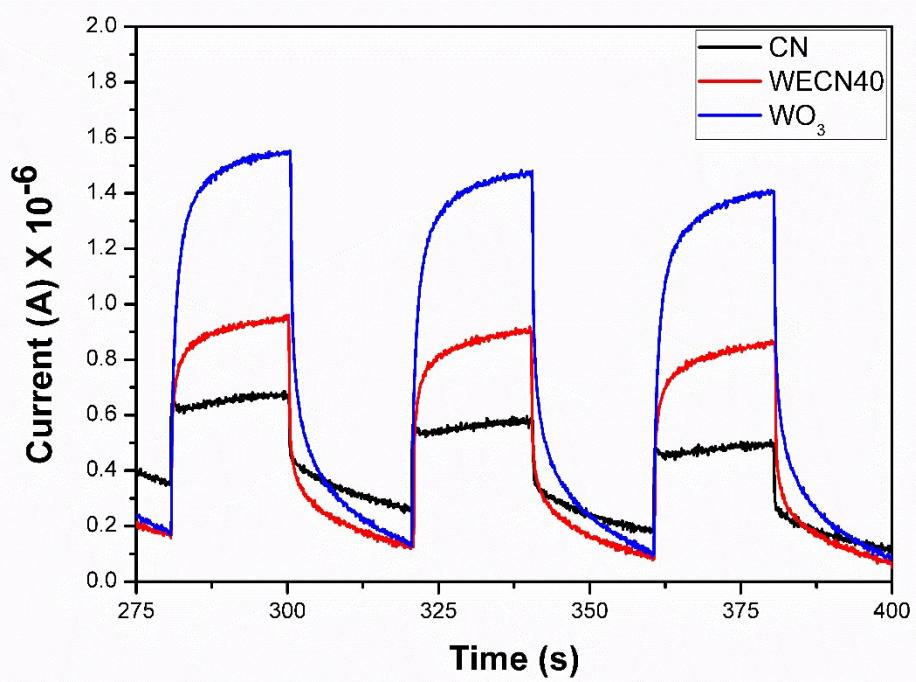

**Fig. S9** Transient photocurrent response of CN, WECN40 and WO<sub>3</sub>.



**Table S1**

The specific surface area, pore volume, and pore diameter of samples.

|                                      | <b>g-C<sub>3</sub>N<sub>4</sub></b> | <b>WECN20</b> | <b>WECN40</b> | <b>WECN60</b> | <b>WECN80</b> | <b>WO<sub>3</sub></b> |
|--------------------------------------|-------------------------------------|---------------|---------------|---------------|---------------|-----------------------|
| S <sub>BET</sub> (m <sup>2</sup> /g) | 21.469                              | 31.913        | 38.835        | 50.925        | 41.081        | 19.844                |
| Pore Volume (cm/g)                   | 0.166                               | 0.175         | 0.167         | 0.179         | 0.153         | 0.046                 |
| Pore Diameter (nm)                   | 51.796                              | 2.582         | 2.105         | 1.148         | 1.959         | 19.844                |
